# Supplementary material for: Actin nucleators safeguard replication forks by limiting nascent strand degradation
Source: bioRxiv preprint, doi:10.1101/2023.01.12.523639, version 1 (2023-01-12)
Supplement: Supplementary figures [file 523639_file02.pdf]

## Supplementary figures

### Figure S1

- A. Schematic showing iPOND experimental design.
- B. WB analysis of iPOND in HEK293TN cells showing DIAPH1 and N-WASp association with nascent DNA (EdU) upon exposure to HU with/without thymidine (Thy) chase. PCNA is shown as a reference event.
- C. WB analysis of iPOND in human T cells showing DIAPH1 and WASp association with nascent DNA (EdU) upon exposure to HU with/without thymidine (Thy) chase. upon exposure to HU. RPA2 is shown as a reference event.
- D. Representative images of antibody controls for PLA experiments; anti Biotin only (rabbit or mouse, as indicated) and anti-PCNA only act as negative controls, anti-Biotin (rabbit):anti-Biotin (mouse) act as a positive control.
- E. Representative images and dot plots of number of N-WASp/PCNA PLA and WASp/PCNA PLA foci per nucleus in HeLa cells untreated (NT) or treated with HU as indicated (red lines indicate mean values). Dot plots represent data pooled from two independent experiments. Statistical significance was determined using the Mann-Whitney test.

### Figure S2

- A. WB analysis confirming DIAPH1 and N-WASp knock-down efficiency in HeLa cells.
- B. Bar chart representing qPCR data confirming WASp knock-down efficiency in HeLa cells.
- C. qPCR and WB analysis confirming WASp and N-WASp knock down efficiency in HeLa cells with additional siRNAs (denoted as #1 or #2) as in panel D.

- D. Box plots of CldU/IdU tract ratios from HeLa cells treated with control siRNA or siRNA targeting WASp or N-WASp as indicated. Cells were treated with 1mM HU during CldU labelling pulse. Whiskers indicate 5-95 percentile. Box plots represent data pooled from two independent experiments. Statistical significance was determined using the Mann-Whitney test.
- E. Box plots of CldU/IdU tract ratios from HeLa cells treated with CK-666 (ARP2/3 inhibitor) (+) or DMSO (-). Cells were treated with 1mM HU during CldU labelling pulse. Whiskers indicate 5-95 percentile. Box plots represent data pooled from three independent experiments. Statistical significance was determined using the Mann-Whitney test.

### Figure S3

- A. Box plots of CldU/IdU tract ratios from HeLa cells depleted of WASp (siWASp) or not (siCTRL), and treated with CK-666 ARP2/3 inhibitor (+) or DMSO (-). Cells were exposed to 1mM HU during CldU labelling pulse. Whiskers indicate 5-95 percentile. Box plots represent data pooled from three independent experiments. Statistical significance was determined using the Mann-Whitney test.
- B. Representative images and dot plots of the number of 53BP1 foci per cyclin A positive HeLa cells, treated with CK-666 (ARP2/3 inhibitor) or CTRL (DMSO), and DIAPH1-deficient patient-derived cells exposed to HU (+) or not (-). Dot plots represent data pooled from two independent experiments. Statistical significance was determined using the Mann-Whitney test.
- C. Representative images and quantification of micronuclei formation (indicated by an arrow) in HeLa cells treated with CK-666 (ARP2/3 inhibitor) (+) or with DMSO (-).

Bar charts represent mean  $\pm$  SEM of three independent experiments. Statistical significance was determined using t test.

- D. Box plots of CldU/IdU tract ratios from HeLa cells treated with control siRNA or siRNA targeting WASp mock treated or treated with Mirin or siRNA targeting DNA2. CldU/IdU pulse labelling was followed by treatment with 4mM HU for 4h. Whiskers indicate 5-95 percentile. Box plots represent data pooled from two independent experiments. Statistical significance was determined using the Mann-Whitney test.

#### **Figure S4**

- A. Representative images and dot plots of RPA signal intensity per nucleus of DIAPH1-deficient patient-derived cells exposed to HU at the indicated dose/duration (red lines indicate mean values). Dot plots represent data pooled from two independent experiments. Statistical significance was determined using the Mann-Whitney test. A.U., arbitrary units.
- B. Representative images and dot plots of RPA signal intensity per nucleus of HeLa cells treated with control siRNA or additional siRNA targeting WASp or N-WASP upon HU treatment as indicated (red lines indicate mean values). Dot plots represent data pooled from two independent experiments. Statistical significance was determined using the Mann-Whitney test.
- C. Representative images and dot plots of RPA signal intensity per nucleus of HeLa cells treated with CK-666 (ARP2/3 inhibitor) (+) or DMSO (-) upon HU treatment as indicated (red lines indicate mean values). Dot plots represent data pooled from two independent experiments. Statistical significance was determined using the Mann-Whitney test.

## Figure S5

- A. WB showing cytoplasmic ( $\alpha$ -tubulin as cytoplasmic loading control) and nuclear protein levels (Lamin-B1 as nuclear loading control) of RPA1 and RPA2 upon depletion of N-WASp, WASp or DIAPH1.
- B. Representative images and dot plots of RPA signal intensity per nucleus of U2OS WT cells and U2OS cells overexpressing RPA (RPA O.E) treated with control siRNA (CTRL) or siRNA targeting DIAPH1 or WASp upon HU treatment or no treatment (NT) as indicated (red lines indicate mean values). Dot plots represent data pooled from three or two independent experiments for DIAPH1 and WASp, respectively. Statistical significance was determined using the Mann-Whitney test. ns, nonsignificant.
- C. Box plots of CldU/IdU tract ratios of U2OS WT cells and U2OS cells overexpressing RPA (RPA O.E) treated with control siRNA (-) or siRNA targeting WASp or DIAPH1 (+) and exposed to 1mM HU during CldU labelling pulse. Whiskers indicate 5-95 percentile. Box plots represent data pooled from two independent experiments. Statistical significance was determined using the Mann-Whitney test.

## Figure S6

- A. Representative images and dot plots of the number of 53BP1 foci per cell nucleus in U2OS WT cells and U2OS cells overexpressing RPA upon depleting DIAPH1 or WASp (siDIAPH1 or siWASp) or their control knock down (siCTRL) (red lines indicate mean values). Dot plots represent data pooled from two independent

experiments for DIAPH1 and WASp. Statistical significance was determined using the Mann-Whitney test.

- B. qPCR and WB analysis confirming WASp and DIAPH1 knock-down efficiency in U2OS WT cells and U2OS cells overexpressing RPA.
- C. Representative images and dot plots of RPA signal intensity per nucleus of U2OS WT cells and U2OS cells overexpressing RPA treated with control siRNA or siRNA targeting BRCA2 upon HU treatment as indicated (red lines indicate mean values). Dot plots represent data pooled from two independent experiments.
- D. Box plot of CldU/IdU tract ratios from U2OS WT cells and U2OS cells overexpressing RPA treated with control siRNA or siRNA targeting BRCA2. CldU/IdU pulse labelling was followed by treatment with 4mM HU for 4 h. Whiskers indicate 5-95 percentile. Box plots represent data pooled from two independent experiments. Statistical significance was determined using the Mann-Whitney test.

### **Figure S7**

- A. Coomassie stained SDS-PAGE gel showing purified RPA complex and molecular weight (MW) marker.
- B. WB of immunoprecipitation experiments in HEK293TN cells expressing YFP-NLS- $\beta$ -actin WT treated or not with 4mM HU / 3 h.
- C. WB showing CHK1 phosphorylation upon indicated HU treatment for 1 h in HeLa cells expressing YFP- NLS- $\beta$ -actin WT and G13R mutant.

A

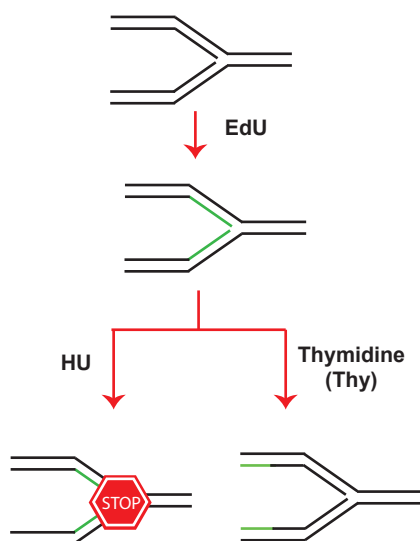

B

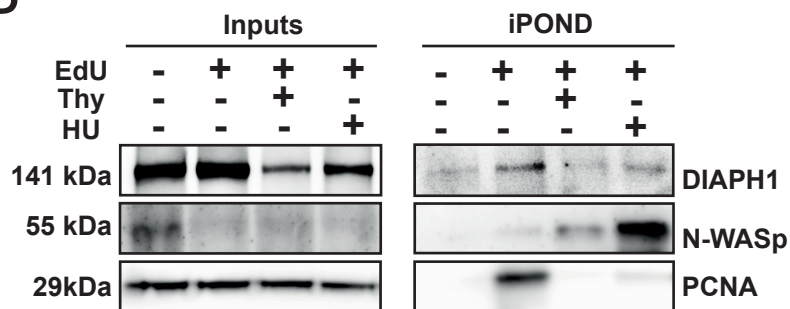

C

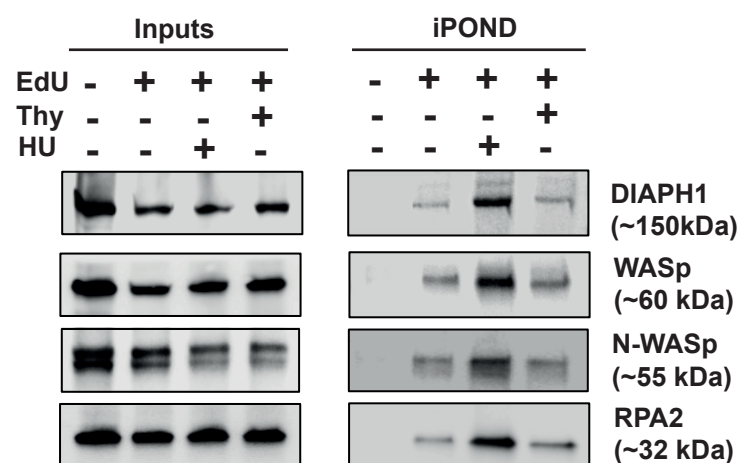

D

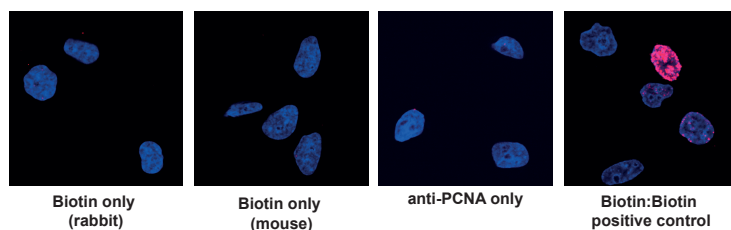

E

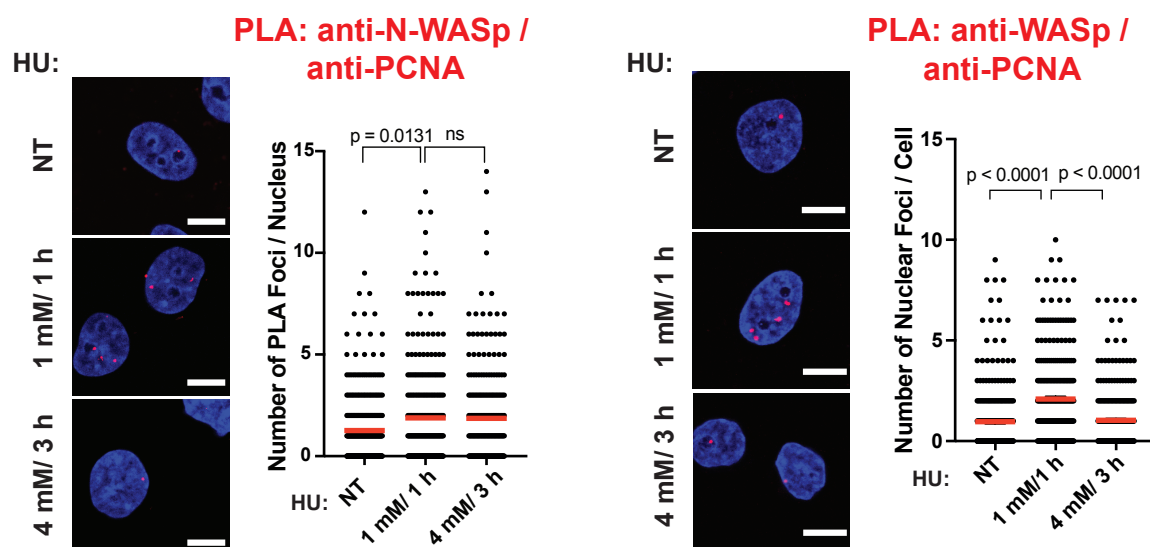

Figure S1

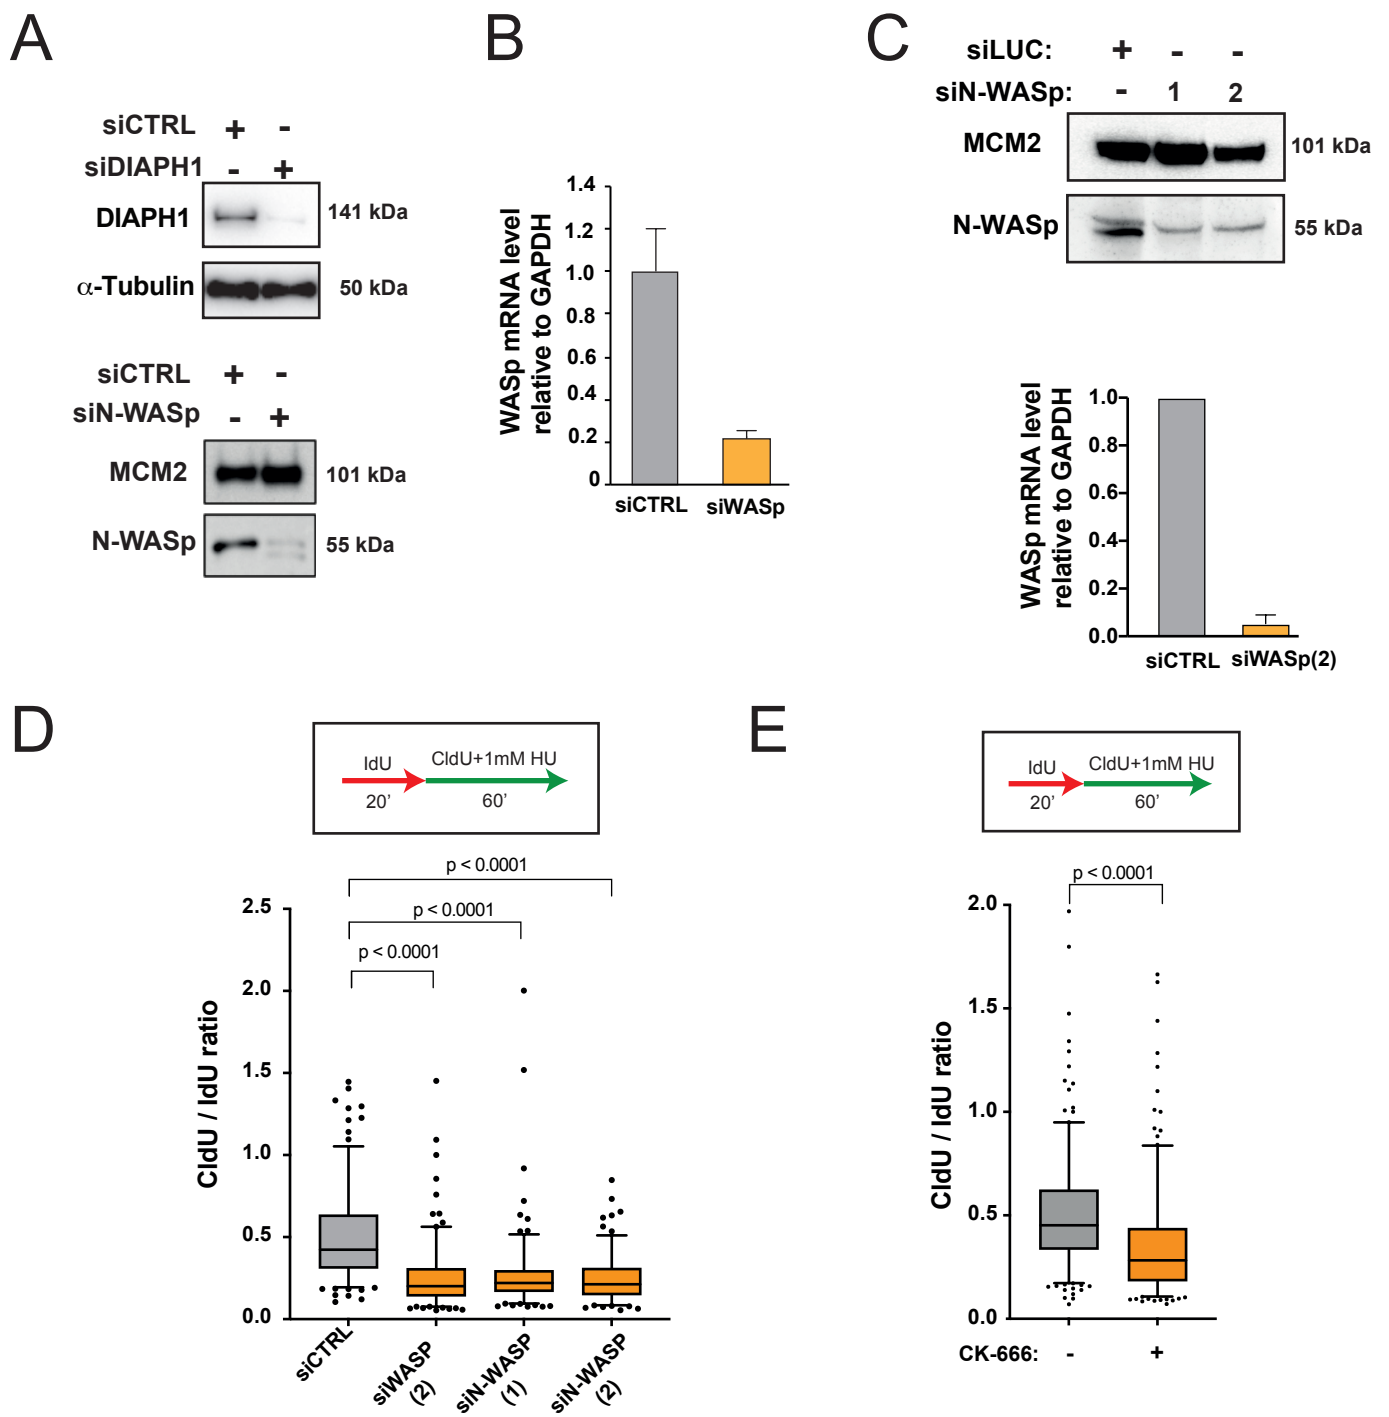

Figure S2

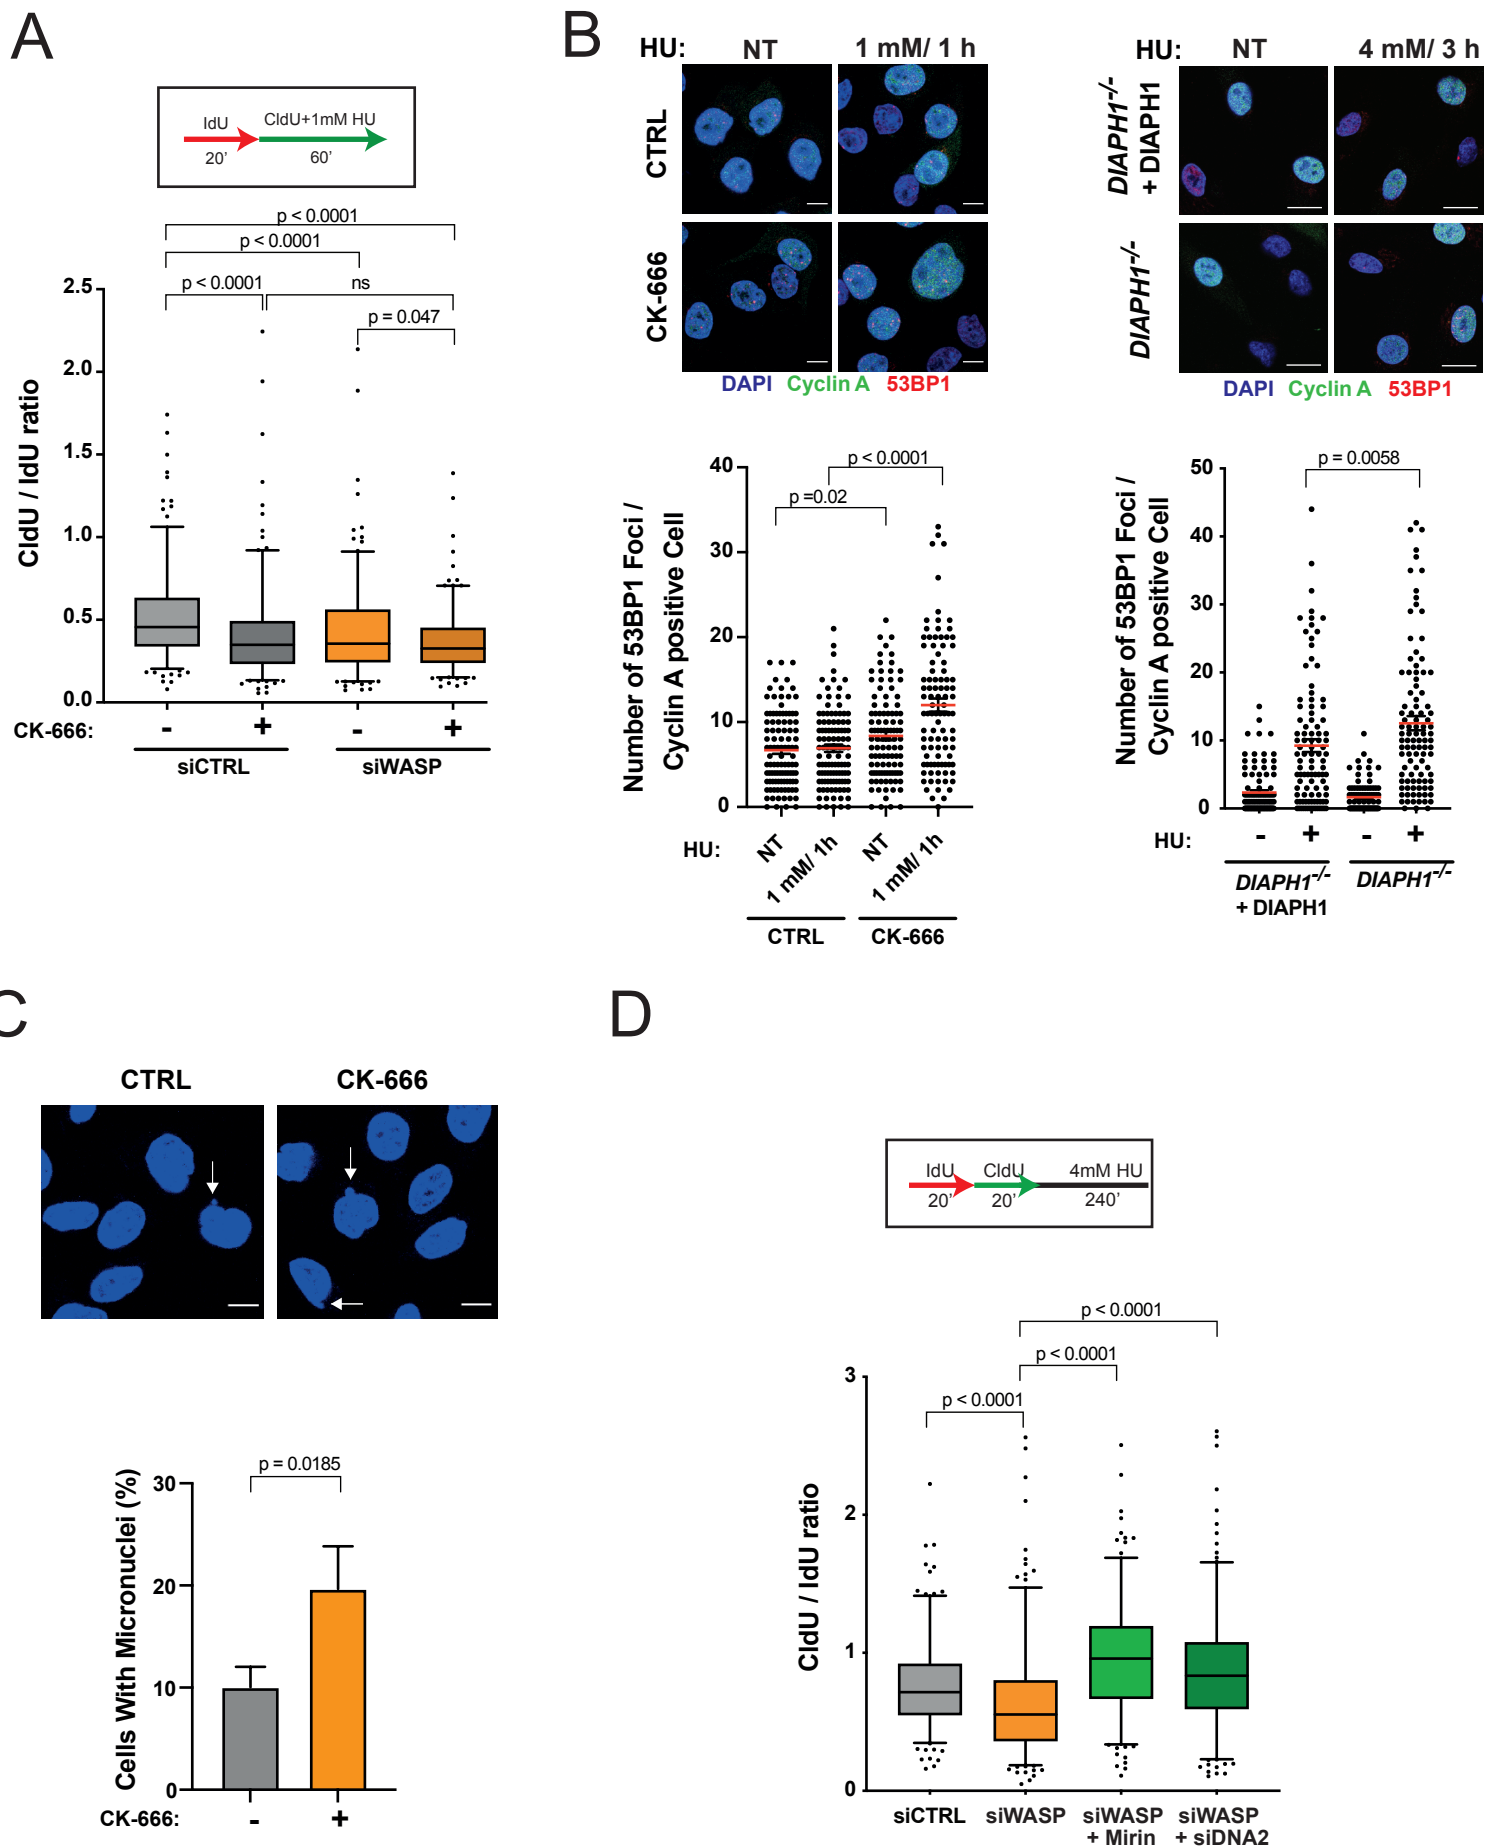

Figure S3

A

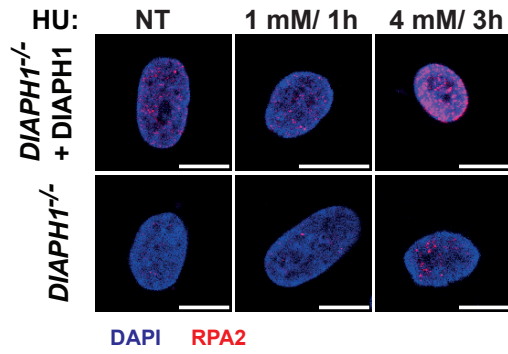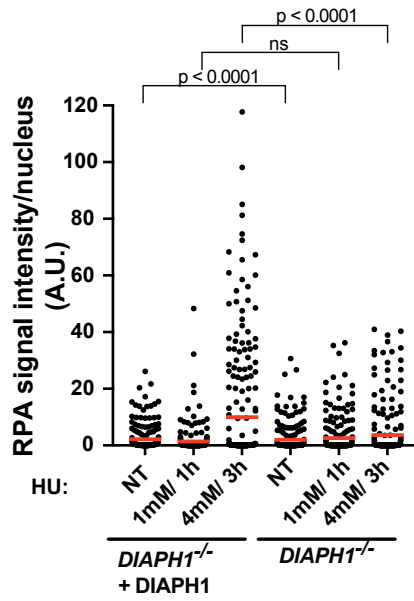

C

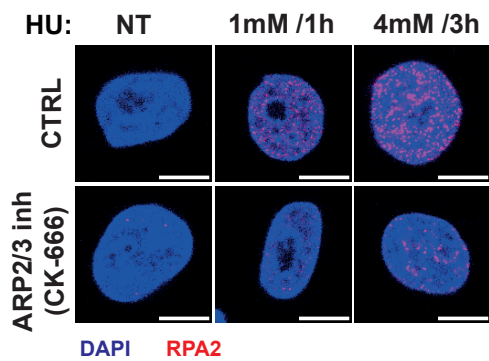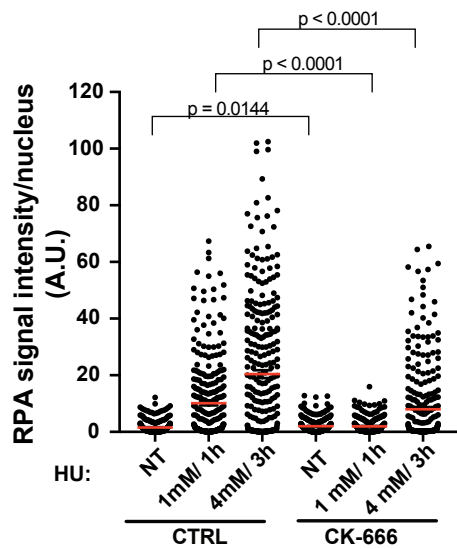

B

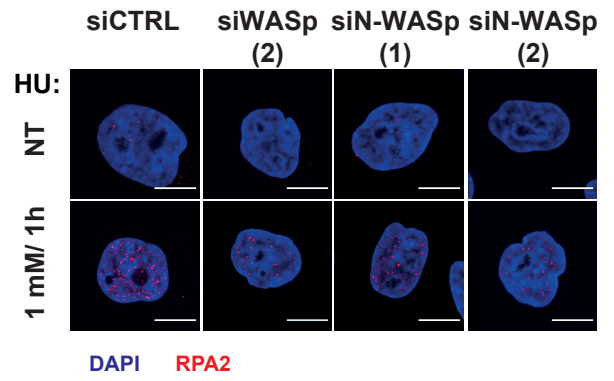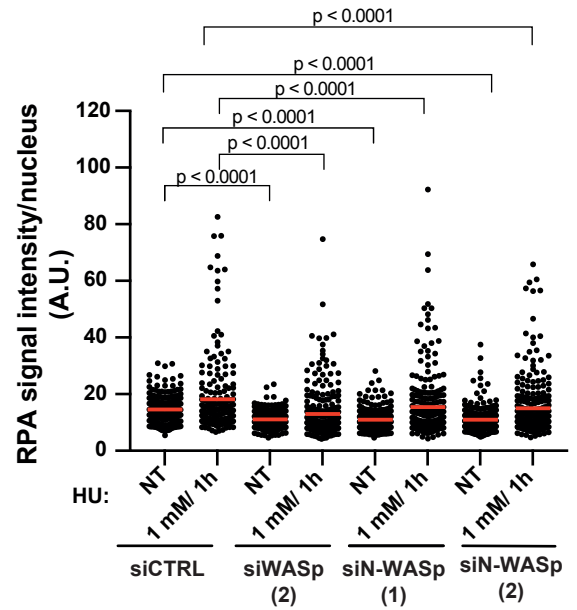

Figure S4

A

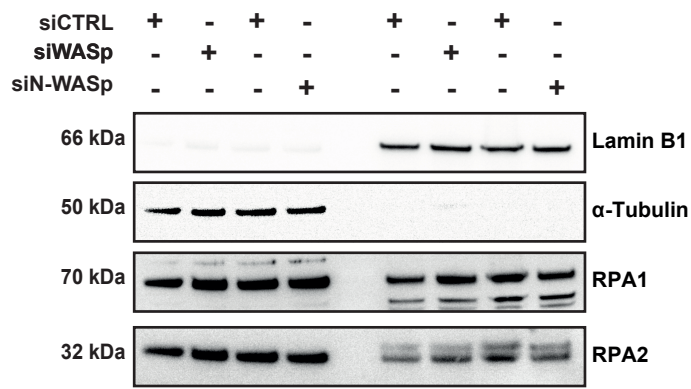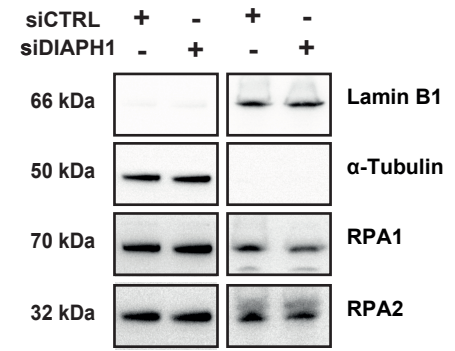

B

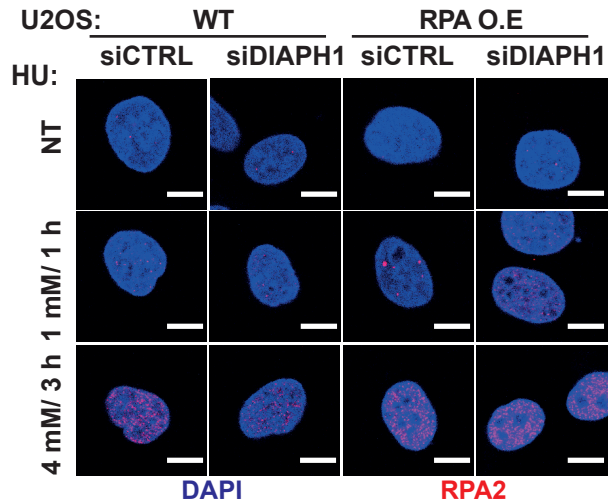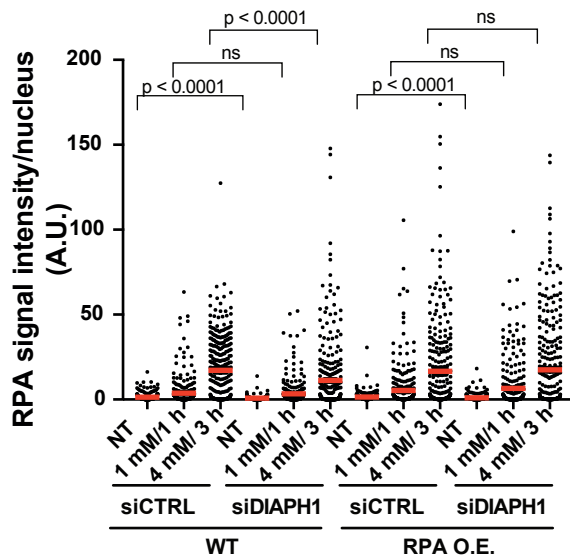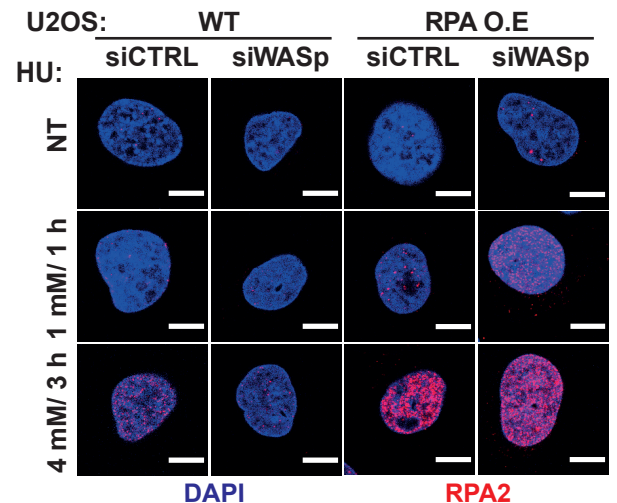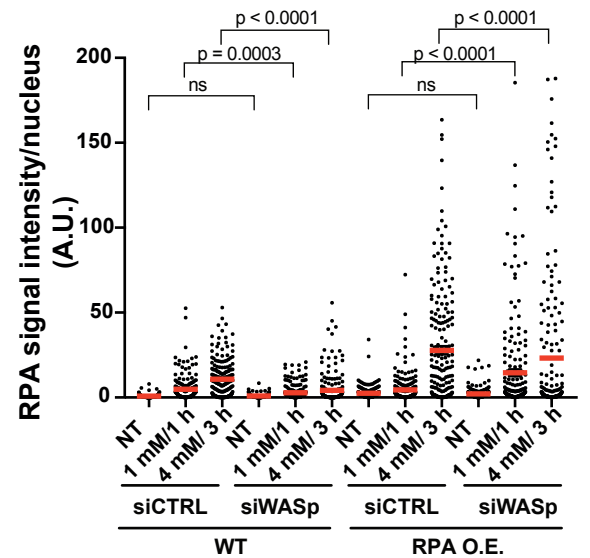

C

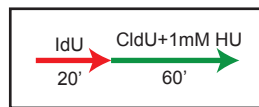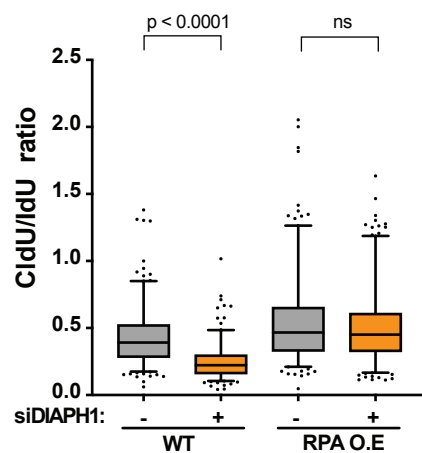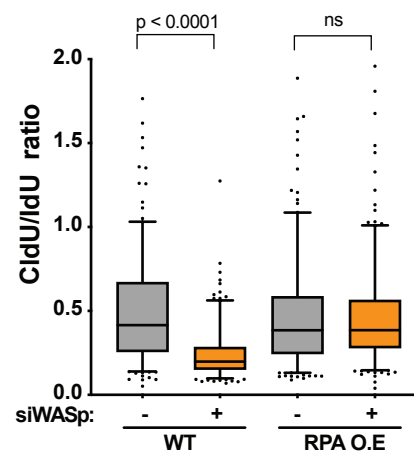

Figure S5

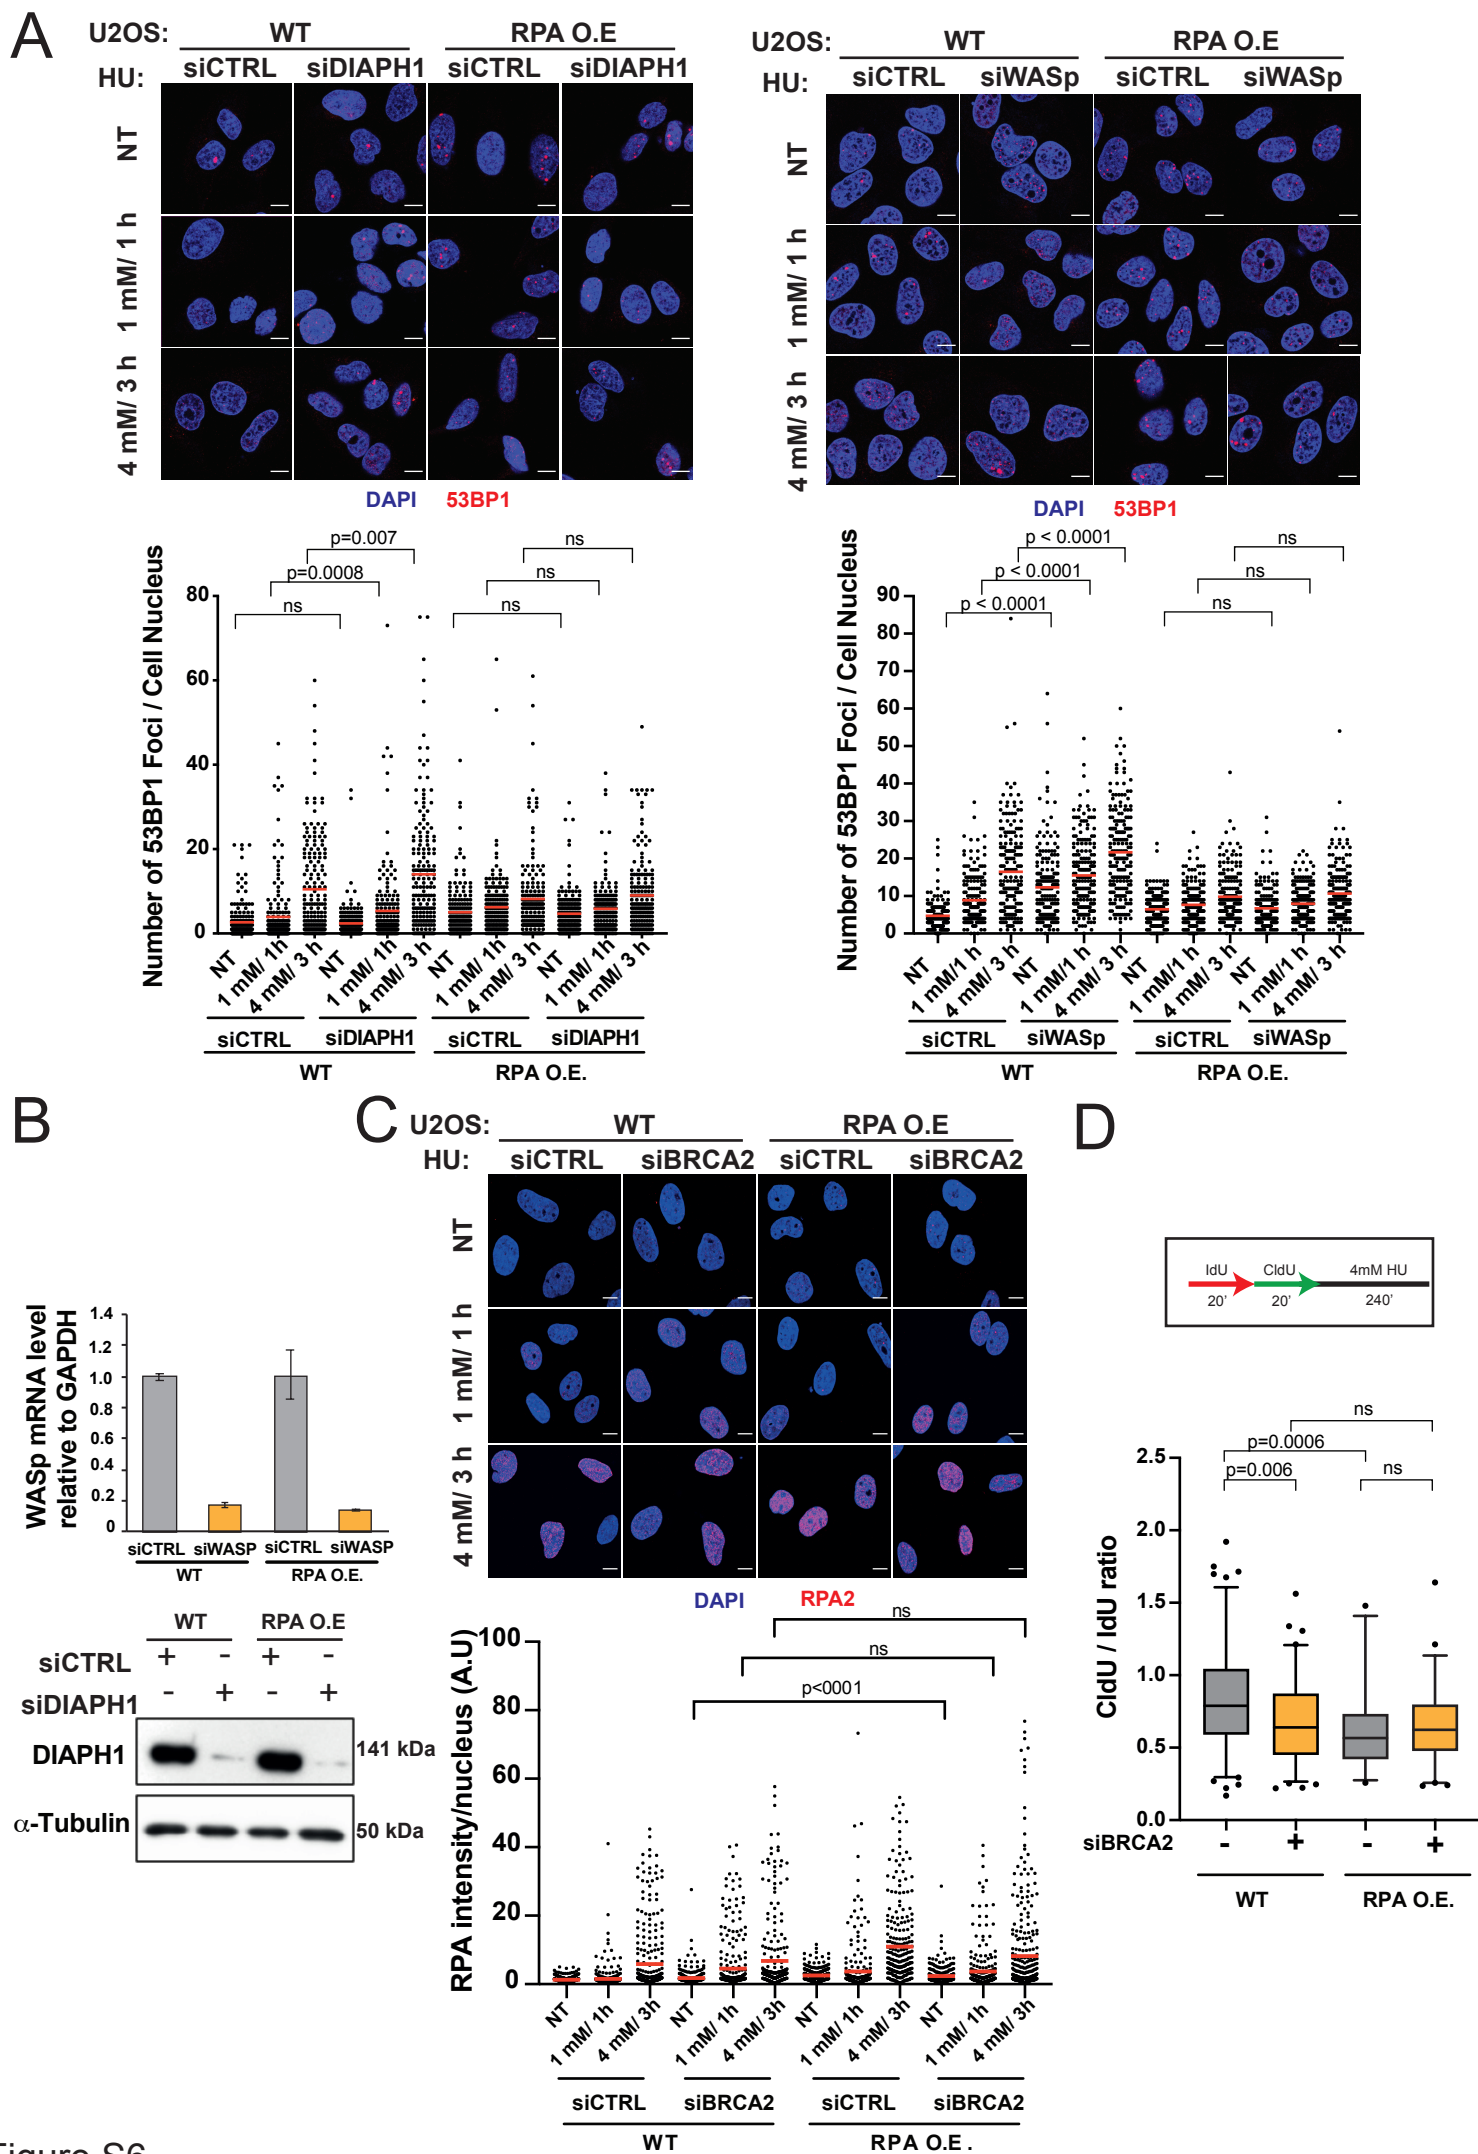

A

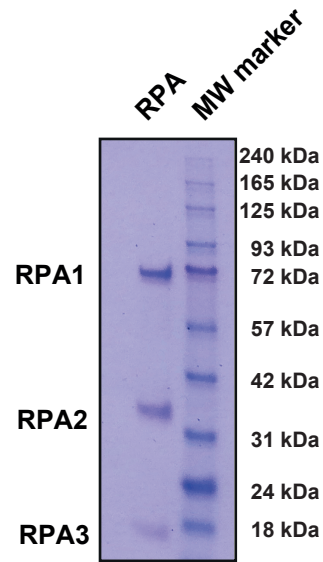

B

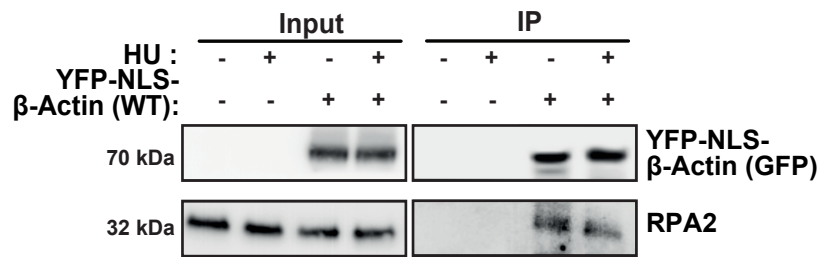

C

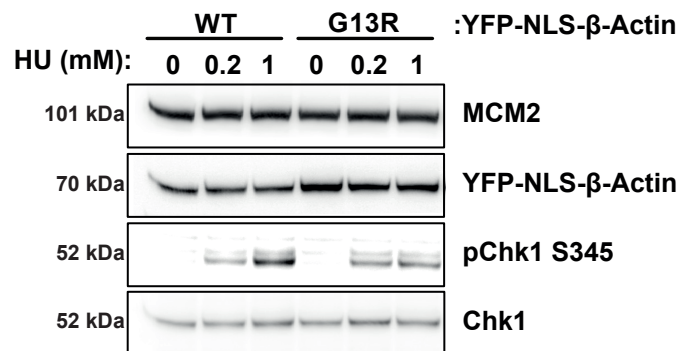

Figure S7
